RESEARCH ARTICLE

# Surveillance of Antibiotic Resistance among Hospital- and Community-Acquired Toxigenic *Clostridium difficile* Isolates over 5-Year Period in Kuwait

Wafaa Y. Jamal\*, Vincent O. Rotimi

Anaerobe Reference Laboratory and Microbiology Department, Faculty of Medicine, Kuwait University, Jabriya, Kuwait

\* [wjamal@hsc.edu.kw](mailto:wjamal@hsc.edu.kw)

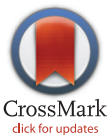

## Abstract

*Clostridium difficile* infection (CDI) is a leading and an important cause of diarrhea in a healthcare setting especially in industrialized countries. Community-associated CDI appears to add to the burden on healthcare setting problems. The aim of the study was to investigate the antimicrobial resistance of healthcare-associated and community-acquired *C. difficile* infection over 5 years (2008–2012) in Kuwait. A total of 111 hospital-acquired (HA-CD) and 35 community-acquired *Clostridium difficile* (CA-CD) clinical isolates from stool of patients with diarrhoea were studied. Antimicrobial susceptibility testing of 15 antimicrobial agents against these pathogens was performed using E test method. There was no evidence of resistance to amoxicillin-clavulanic acid, daptomycin, linezolid, piperacillin-tazobactam, teicoplanin and vancomycin by both HA-CD and CA-CD isolates. Metronidazole had excellent activity against CA-CD but there was a 2.9% resistance rate against HA-CD isolates. Ampicillin, clindamycin, levofloxacin and imipenem resistance rates among the HC-CD vs. CA-CD isolates were 100 vs. 47.4%; 43 vs. 47.4%; 100 vs. 100% and 100 vs. 89%, respectively. An unexpected high rifampicin resistance rate of 15.7% emerged amongst the HA-CD isolates. In conclusion, vancomycin resistance amongst the HA-CD and CA-CD isolates was not encountered in this series but few metronidazole resistant hospital isolates were isolated. High resistance rates of ampicillin, clindamycin, levofloxacin, and imipenem resistance were evident among both CA-CD and HA-CD isolates. Rifampicin resistance is emerging among the HA-CD isolates.

## OPEN ACCESS

**Citation:** Jamal WY, Rotimi VO (2016) Surveillance of Antibiotic Resistance among Hospital- and Community-Acquired Toxigenic *Clostridium difficile* Isolates over 5-Year Period in Kuwait. PLoS ONE 11 (8): e0161411. doi:10.1371/journal.pone.0161411

**Editor:** Ulrich Nübel, Leibniz-Institute DSMZ, GERMANY

**Received:** May 30, 2016

**Accepted:** August 4, 2016

**Published:** August 18, 2016

**Copyright:** © 2016 Jamal, Rotimi. This is an open access article distributed under the terms of the [Creative Commons Attribution License](https://creativecommons.org/licenses/by/4.0/), which permits unrestricted use, distribution, and reproduction in any medium, provided the original author and source are credited.

**Data Availability Statement:** All relevant data are within the paper.

**Funding:** This work was supported by Kuwait University Research Grant no. MI 05/10. The funder had no role in study design, data collection, and analysis, decision to publish or preparation of the manuscript.

**Competing Interests:** The authors have declared that no competing interests exist.

## Introduction

*Clostridium difficile* is a Gram-positive, spore-forming anaerobic bacteria. It has an important role in hospital-acquired diarrhoea ranging from mild cases to severe pseudomembranous colitis, collectively named *C. difficile* infection (CDI). The number of CDI has increased dramatically in term of frequency, severity, occurrence in outbreaks setting and recurrence rate since

2002 in North America [1], Europe [2] and Australia [3]. This is partially related to the emergence of the hypervirulent strains i.e. *C. difficile* B1/ NAP1/027 [4]. Another hypervirulent strain i.e. *C. difficile* ribotype 078 has emerged, whose incidence increased from 3 to 13% during 2005–2008 in the Netherlands [4]. In addition, new risk groups have been added to the list which include community-onset CDI [5, 6], CDI in children as well as peripartum ladies [7].

Antimicrobial therapy plays an important role in the development of CDI. This risk increases if *C. difficile* is resistant to the offending or the used antimicrobial agent [8]. One of the main theories for the rise in the reported cases as well as outbreaks of CDI is the circulation of fluoroquinolone-resistant *C. difficile* ribotype 027 at the same time as the wild use of fluoroquinolones in hospitals [9]. Antibiotic resistance are important in the emergence of epidemic clones and persistence of specific types over time in the hospitals.

CDI plays a significant burden on the healthcare setting and financial resources. Treatment of *C. difficile* is difficult because of its direct causal relationship with antibiotic use. The two most commonly prescribed antimicrobial agents for treatment of CDI are metronidazole and vancomycin with high recurrence rates. Antimicrobial susceptibility testing is not done routinely for anaerobes including *C. difficile*. Although *C. difficile* has been reported as susceptible to metronidazole and vancomycin, there are some reports of reduced susceptibility of *C. difficile* to metronidazole [10,11]. High percentage of multi-drug resistant (resistant to 3 or more drugs) *C. difficile* was found in certain European hospitals [12]. There is no clear relationship or association between treatment failure and reduced susceptibility or resistance to metronidazole or vancomycin. The aim of this study was to investigate the trend of antibiotic resistance of healthcare-associated and community-acquired *C. difficile* infection (HA-CDI; CA-CDI) over 5 years (2008–2012) in Kuwait.

## Methods

### Definitions

Diarrhea was defined as loose stools, i.e. taking the shape of the container or corresponding to Bristol stool chart types 5–7, plus a stool frequency of three stools in 24 h or fewer consecutive hours or more frequently than is normal for the individual (definition of World Health Organization, <http://www.who.int/topics/diarrhoea>) [13, 14, 15]. According to the European Centre for Disease Prevention and Control [16], an episode of CDI was defined as a patient with diarrhea whose stool takes the shape of the container, and it is positive for *C. difficile* toxin A and/or B without other etiology or endoscopic evidence of pseudomembranous colitis.

CA-CDI was defined, in this study, as the onset of symptoms occurring while the patient was outside a healthcare facility and the patient had not been discharged from a healthcare facility within 12 weeks before symptom onset (community onset/community-acquired); or the onset of symptoms occurring within 48 h upon admission to a healthcare facility and the patient had no prior stay in a healthcare facility within the 12 weeks prior to symptom onset (healthcare facility onset; community-acquired) [16].

### Bacterial strains

Stool samples were collected from diarrheagenic patients suspected of *C. difficile* infection acquired in the hospital or community from 2008–2012. They were processed in the Anaerobe Reference Laboratory, (ARL, Ministry of Health), Faculty of Medicine, Kuwait. Stool specimens were cultured on selective media (cycloserine-cefoxitin fructose agar; CCFA, Oxoid limited, Basingstoke, Hampshire, UK) after heat-shock procedure. Suspected *C. difficile* isolates were identified by Gram staining, typical morphology on agar plates, as well as characteristic odour. Then it was identified further by biochemical tests using API 20A (bioMerieux, Marcy l'Etoile,

France) and confirmed by VITEK MS (bioMérieux). Toxin production was investigated by GeneXpert™ *C. difficile* assay (Cepheid, Sunnyvale, CA, USA) and EIA method using *C. difficile* Quik Chek Complete kit (QCC) (TechLab, Blacksburg, VA, USA) according to manufacturer's instructions.

### Antimicrobial susceptibility testing (AST)

AST was performed for the following antimicrobial agents: ampicillin, amoxicillin-clavulanic acid, clindamycin, daptomycin, erythromycin, imipenem, levofloxacin, linezolid, meropenem, metronidazole, piperacillin-tazobactam, rifampicin, teicoplanin, tigecycline and vancomycin. AST was done by determining the minimum inhibitory concentrations (MICs) of the above antibiotics using the E test method (bioMérieux), according to the manufacturer's instructions, on Brucella agar supplemented with hemin (5 µg/ml); Sigma-Aldrich, St. Louis, Missouri, USA), Vitamin K<sub>1</sub> (1 µg/ml; HiMedia Laboratories Pvt. Ltd, Mumbai, India) and laked sheep blood (5% v/v). Resistance profiles of the isolates were determined according to the interpretative criteria recommended by the CLSI [17] for ampicillin, amoxicillin-clavulanic acid, piperacillin-tazobactam, imipenem, meropenem, clindamycin and metronidazole, while EUCAST, 2014 were applied for levofloxacin, vancomycin, tigecycline, daptomycin, and rifampicin ([www.eucast.org/clinical\\_breakpoints](http://www.eucast.org/clinical_breakpoints)). If no standard MIC breakpoint had been defined such as for linezolid, erythromycin, and teicoplanin, susceptibility breakpoint was considered to be ≤4 µg/ml [18], ≤8 µg/ml [19], and ≤8 µg/ml (*Staphylococcus aureus* according to CLSI), respectively [17], were used. *C. difficile* ATCC 700057 and *Eubacterium lentum* ATCC 43055 were used as quality control organisms with each run. MIC<sub>50</sub> and MIC<sub>90</sub> values for each antibiotic was calculated by using Microsoft Excel.

### PCR ribotyping

PCR ribotyping of all isolates was performed as previously described [20].

### Statistical analysis

Fisher's exact test (two-sided) was used to test for difference between CA-CD and HA-CD with those differences showing  $p < 0.05$  deemed to be statistically significant.

### Ethics statement

Collection of the strains was conducted according to the Declaration of Helsinki and with particular institutional ethical and professional standards. A written informed consent was not obtained from patients or parents of children because the bacterial isolates studied were collected from the routine work of clinical microbiology laboratory for patient care and no additional clinical specimens were collected for the purpose of the study. It is a standard practice not to get written informed consent for use of bacterial isolates unlinked to patient identity from the routine clinical laboratory. Therefore, the waiver for informed consent was granted and the study was approved by the Medical Ethics Committee of Ministry of Health, Kuwait (permit number 2093/MTT).

### Results

A total of 111 hospital-acquired and 35 community-acquired toxigenic *C. difficile* isolates were analyzed. The distribution of HA-CD and CA-CD over 5 years is shown in [Table 1](#).

Amoxicillin-clavulanic acid (MIC<sub>90</sub> = 1 vs. 0.75 µg/ml), daptomycin (MIC<sub>90</sub> = 4 vs. 0.75 µg/ml), linezolid (MIC<sub>90</sub> = 3 vs. 1 µg/ml), metronidazole (MIC<sub>90</sub> = 0.75 vs. 0.125 µg/ml),

**Table 1. Number of hospital-acquired *C. difficile* (HA-CD) and community-acquired *C. difficile* (CA-CD) isolates per year.**

|       | 2008 | 2009 | 2010 | 2011 | 2012 | Total |
|-------|------|------|------|------|------|-------|
| CA-CD | 5    | 8    | 7    | 8    | 7    | 35    |
| HA-CD | 17   | 31   | 13   | 43   | 7    | 111   |

HA-CD = Hospital-acquired *Clostridium difficile* isolates; CA-CD = community-acquired *C. difficile* isolates.

doi:10.1371/journal.pone.0161411.t001

piperacillin-tazobactam (MIC<sub>90</sub> = 6 vs. 6 µg/ml), teicoplanin (MIC<sub>90</sub> = 0.5 vs. 0.38 µg/ml) and vancomycin (MIC<sub>90</sub> = 3 vs. 1.5 µg/ml) had excellent activities against both HA-CD and CA-CD isolates, respectively as shown in Table 2.

There was no significant difference in the resistance against HA-CD and CA-CD isolates for the above antimicrobial agents. All community isolates were resistant to ampicillin compared to only 4.7.4% of the hospital isolates (p<0.001); (MIC<sub>90</sub> = 2 vs. 1.5 µg/ml). The HA-CD isolates were more resistant to clindamycin than the CA-CD (MIC<sub>90</sub> ≥256 vs. 3 µg/ml) with resistance slightly higher among HA-CD (47.4% vs. 43%; p = 0.70). Similarly, resistance to erythromycin was more common among HA-CD compared to CA-CD (MIC<sub>90</sub> = 256 vs. 0.38 µg/ml and 58% vs. 14.3%; p<0.001). Resistance to imipenem was very common among both HA-CD and CA-CD isolates MIC<sub>90</sub> >32 vs. >32 µg/ml and 89% and 100%; p = 0.07; while resistance to meropenem was more common among CA-CD compared to HA-CD (MIC<sub>90</sub> = >32 vs. 1 µg/ml; 43 vs. 0%; p <0.001). Rifampicin (MIC<sub>90</sub> = <0.002 vs. 32 µg/ml) resistance was seen commonly among the hospital isolates compared to the community isolates (15.7 vs. 0%; p = 0.014). Tigecycline resistance was seen more often among the hospital isolates compared to the community isolates (5.3 vs. 0%) although the difference is not statistically significant (p = 0.34).

Table 3 shows the PCR ribotypes for both CA-CD and HA-CD isolates. Among the CA-CDI isolates, eleven (31.4%) isolates belonged to PCR ribotype 139, 7 (20%) isolates belonged to ribotype 097, 6 (17.1%) isolates belonged to ribotype 070. Four (11.4%) each of the

**Table 2. Antimicrobial susceptibility results of 111 hospital-acquired *C. difficile* (HA-CD) and 35 community-acquired *C. difficile* (CA-CD) isolates.**

| Antibiotic (breakpoints in µg/ml) | MIC <sub>50</sub> (in µg/ml) |       | MIC <sub>90</sub> (in µg/ml) |       | % of resistance |       | P value |
|-----------------------------------|------------------------------|-------|------------------------------|-------|-----------------|-------|---------|
|                                   | CA-CD                        | HA-CD | CA-CD                        | HA-CD | CA-CD           | HA-CD |         |
| Ampicillin (0.5)                  | 1                            | 0.5   | 2                            | 1.5   | 100             | 47.4  | <0.001  |
| Amoxicillin-clavulanic acid (4/2) | 0.25                         | 0.25  | 0.75                         | 1     | 0               | 0     | -       |
| Clindamycin (2)                   | 2                            | 0.2   | 3                            | >256  | 43              | 47.4  | 0.70    |
| Daptomycin (4)                    | 0.38                         | 0.38  | 0.75                         | 4     | 0               | 0     | -       |
| Erythromycin (8)                  | 0.25                         | 256   | 0.38                         | 256   | 14.3            | 58    | <0.001  |
| Imipenem (4)                      | >32                          | 32    | >32                          | >32   | 100             | 89    | 0.07    |
| Levofloxacin (4)                  | >32                          | 32    | >32                          | 32    | 100             | 100   | -       |
| Linezolid (4)                     | 0.75                         | 0.75  | 1                            | 3     | 0               | 0     | -       |
| Meropenem (4)                     | 2                            | 0.75  | >32                          | 1     | 43              | 0     | <0.001  |
| Metronidazole (8)                 | 0.094                        | 0.125 | 0.125                        | 0.75  | 0               | 2.9   | 1.00    |
| Piperacillin-tazobactam (32/4)    | 4                            | 0.19  | 6                            | 6     | 0               | 0     | -       |
| Rifampicin (0.004)                | <0.002                       | 0.001 | <0.002                       | 32    | 0               | 15.7  | 0.014   |
| Teicoplanin (8)                   | 0.25                         | 0.25  | 0.38                         | 0.5   | 0               | 0     | -       |
| Tigecycline (0.25)                | 0.023                        | 0.016 | 0.032                        | 0.25  | 0               | 5.3   | 0.34    |
| Vancomycin (4)                    | 1                            | 1     | 1.5                          | 3     | 0               | 0     | -       |

HA-CD = Hospital-acquired *Clostridium difficile* isolates; CA-CD = community-acquired *C. difficile* isolates

doi:10.1371/journal.pone.0161411.t002

**Table 3. *C. difficile* PCR ribotypes of CA-CDI and HA-CDI.**

| PCR Ribotype    | CA-CDI    |            | HA-CDI     |            |
|-----------------|-----------|------------|------------|------------|
|                 | Number    | Percentage | Number     | Percentage |
| 001             | -         | -          | 21         | 18.9       |
| 002             | -         | -          | 23         | 20         |
| 003             | -         | -          | 12         | 10.8       |
| 005             | -         | -          | 4          | 3.6        |
| 014             | 3         | 8.6        | 6          | 5.4        |
| 029             | -         | -          | 4          | 3.6        |
| 056             | 4         | 11.4       | 3          | 2.7        |
| 057             | -         | -          | 5          | 4.5        |
| 070             | 6         | 17.1       | -          | -          |
| 083             | -         | -          | 3          | 2.7        |
| 097             | 7         | 20         | -          | -          |
| 107             | -         | -          | 3          | 2.7        |
| 126             | -         | -          | 14         | 12.6       |
| 139             | 11        | 31.4       | -          | -          |
| 159             | -         | -          | 4          | 3.6        |
| 177             | -         | -          | 3          | 2.7        |
| 179             | 4         | 11.4       | -          | -          |
| 195             | -         | -          | 6          | 5.4        |
| <b>Total no</b> | <b>35</b> |            | <b>111</b> |            |

doi:10.1371/journal.pone.0161411.t003

2 ribotypes belonged to ribotype 056 and 179, and only 3 (8.6%) isolates belonged to ribotype 014.

As shown in Table 3, 14 distinct, genotypically different ribotypes were identified among the 111 HA-CD isolates. The commonest PCR ribotypes were the following: 23 (20%) isolates belonged to ribotype 002, 21 (18.9%) ribotype 001, 14 (12.6%) ribotype 126, and 12 (10.8%) ribotype 003. The remaining isolates belonged to 10 different ribotypes which were 014 (6, 5.4%), 195 (6, 5.4%), 057 (5, 4.5%), 4 (3.6%) each of ribotype 005, 029, and 159, 3 (2.7%) each of ribotype 056, 083, 107 and 177.

The MIC<sub>50</sub>, MIC<sub>90</sub> and percentage of resistance to the common PCR ribotypes in both CA-CDI and HA-CDI are shown in Table 4. Only PCR ribotypes 014 and 056 were common to both CA-CDI and HA-CDI. Resistance to erythromycin, clindamycin and rifampicin was more common among HA-CD ribotypes compared to CA-CD (66.6, 78, 28.6% vs. 35, 7.1 and 0%, respectively). However, the resistance to amoxicillin and meropenem was more common among the CA-CD ribotypes compared to HA-CD (100, 48.9% vs. 55, and 0%, respectively).

## Discussion

Knowing the antimicrobial susceptibility is critically important when treating patients with CDI in hospital as well as in community settings. Only one study on hospital-acquired *C. difficile* antimicrobial susceptibility in Kuwait has been published and that was 13 years ago [21]. In the previous study, antimicrobial susceptibility of 15 antimicrobial agents was determined by E test methodology for hospital acquired *C. difficile* isolates collected from patients in intensive care units of 3 hospitals over a period of 2 years in Kuwait [21]. There have been no study in Kuwait or elsewhere comparing the susceptibility of HA-CD and CA-CD.

In this study, we have evaluated 15 antimicrobial agents, including the two antibiotics currently used as standard therapy for CDI, vancomycin and metronidazole, against 111 hospital-

**Table 4. Susceptibility and summary of MIC data of different antimicrobial agents and percentage of resistance antibiotics against *C. difficile* isolated from CA-CDI and HA-CDI, by PCR ribotypes.**

| PCR ribotype | Antibiotics   | CA-CDI            |                   |                 | HA-CDI            |                   |                 |
|--------------|---------------|-------------------|-------------------|-----------------|-------------------|-------------------|-----------------|
|              |               | MIC <sub>50</sub> | MIC <sub>90</sub> | % of resistance | MIC <sub>50</sub> | MIC <sub>90</sub> | % of resistance |
| RT 014       | Ampicillin    | 0.75              | 2                 | 100             | 0.5               | 1.0               | 50              |
|              | Amox-clav     | 0.125             | 0.5               | 0               | 0.25              | 1.0               | 0               |
|              | Clindamycin   | 1.0               | 4                 | 35              | 0.75              | 128               | 66.6            |
|              | Erythromycin  | 0.19              | 0.50              | 7.1             | 192               | 256               | 78              |
|              | Levofloxacin  | 32                | 32                | 100             | 24                | 32                | 100             |
|              | Meropenem     | 1.0               | 24                | 48.9            | 0.5               | 0.75              | 0               |
|              | Metronidazole | 0.064             | 0.19              | 0               | 0.094             | 0.19              | 0               |
|              | Rifampicin    | 0.003             | 0.003             | 0               | 0.002             | 2                 | 28.6            |
|              | Vancomycin    | 0.75              | 1.0               | 0               | 1                 | 2                 | 0               |
| RT 056       | Ampicillin    | 1                 | 4                 | 100             | 0.25              | 0.75              | 66.6            |
|              | Amox-clav     | 0.25              | 1.0               | 0               | 0.5               | 1.0               | 0               |
|              | Clindamycin   | 1                 | 3                 | 50              | 0.38              | >256              | 66.6            |
|              | Erythromycin  | 0.5               | 8                 | 25              | 32                | 256               | 100             |
|              | Levofloxacin  | 32                | 32                | 100             | 32                | 32                | 100             |
|              | Meropenem     | 2                 | 8                 | 25              | 0.75              | 1                 | 0               |
|              | Metronidazole | 0.032             | 0.5               | 0               | 0.064             | 0.75              | 0               |
|              | Rifampicin    | 0.002             | 0.002             | 0               | 0.002             | 0.012             | 33.3            |
|              | Vancomycin    | 0.25              | 0.75              | 0               | 0.38              | 0.75              | 0               |
| RT 070       | Ampicillin    | 1.0               | 6                 | 100             | -                 | -                 | -               |
|              | Amox-clav     | 0.047             | 1.0               | 0               | -                 | -                 | -               |
|              | Clindamycin   | 0.5               | 2                 | 16.7            | -                 | -                 | -               |
|              | Erythromycin  | 2                 | 24                | 33.3            | -                 | -                 | -               |
|              | Levofloxacin  | 12                | >32               | 100             | -                 | -                 | -               |
|              | Meropenem     | 0.125             | 16                | 33.3            | -                 | -                 | -               |
|              | Metronidazole | 0.047             | 0.094             | 0               | -                 | -                 | -               |
|              | Rifampicin    | 0.002             | 0.002             | 0               | -                 | -                 | -               |
|              | Vancomycin    | 0.016             | 0.094             | 0               | -                 | -                 | -               |
| RT 097       | Ampicillin    | 8                 | 12.8              | 100             | -                 | -                 | -               |
|              | Amox-clav     | 0.25              | 0.75              | 0               | -                 | -                 | -               |
|              | Clindamycin   | 1.0               | 2                 | 14.3            | -                 | -                 | -               |
|              | Erythromycin  | 0.5               | 8                 | 4.3             | -                 | -                 | -               |
|              | Levofloxacin  | 32                | >32               | 100             | -                 | -                 | -               |
|              | Meropenem     | 1                 | 4                 | 28.6            | -                 | -                 | -               |
|              | Metronidazole | 0.38              | 1.0               | 0               | -                 | -                 | -               |
|              | Rifampicin    | 0.002             | 0.004             | 0               | -                 | -                 | -               |
|              | Vancomycin    | 0.75              | 1.5               | 0               | -                 | -                 | -               |
| RT 139       | Ampicillin    | 1.0               | 2                 | 100             | -                 | -                 | -               |
|              | Amox-clav     | 0.5               | 0.75              | 0               | -                 | -                 | -               |
|              | Clindamycin   | 0.5               | 16                | 45.5            | -                 | -                 | -               |
|              | Erythromycin  | 0.25              | 4                 | 9               | -                 | -                 | -               |
|              | Levofloxacin  | 32                | 32                | 100             | -                 | -                 | -               |
|              | Meropenem     | 2                 | 24                | 27.3            | -                 | -                 | -               |
|              | Metronidazole | 0.19              | 0.38              | 0               | -                 | -                 | -               |
|              | Rifampicin    | 0.002             | 0.002             | 0               | -                 | -                 | -               |
|              | Vancomycin    | 0.5               | 1.0               | 0               | -                 | -                 | -               |

(Continued)

Table 4. (Continued)

| PCR ribotype  | Antibiotics   | CA-CDI            |                   |                 | HA-CDI            |                   |                 |
|---------------|---------------|-------------------|-------------------|-----------------|-------------------|-------------------|-----------------|
|               |               | MIC <sub>50</sub> | MIC <sub>90</sub> | % of resistance | MIC <sub>50</sub> | MIC <sub>90</sub> | % of resistance |
| RT 179        | Ampicillin    | 1                 | 2                 | 100             | -                 | -                 | -               |
|               | Amox-clav     | 0.19              | 0.25              | 0               | -                 | -                 | -               |
|               | Clindamycin   | 0.5               | 3                 | 25              | -                 | -                 | -               |
|               | Erythromycin  | 0.5               | 1.0               | 0               | -                 | -                 | -               |
|               | Levofloxacin  | 32                | 32                | 100             | -                 | -                 | -               |
|               | Meropenem     | 1                 | 32                | 25              | -                 | -                 | -               |
|               | Metronidazole | 0.064             | 0.125             | 0               | -                 | -                 | -               |
|               | Rifampicin    | <0.002            | 0.002             | 0               | -                 | -                 | -               |
|               | Vancomycin    | 0.125             | 0.5               | 0               | -                 | -                 | -               |
|               | RT 001        | Ampicillin        | -                 | -               | -                 | 1.0               | 4               |
| Amox-clav     |               | -                 | -                 | -               | 0.25              | 1.0               | 0               |
| Clindamycin   |               | -                 | -                 | -               | 1.5               | 128               | 23              |
| Erythromycin  |               | -                 | -                 | -               | 16                | 256               | 62              |
| Levofloxacin  |               | -                 | -                 | -               | 32                | 32                | 100             |
| Meropenem     |               | -                 | -                 | -               | 0.5               | 1.0               | 0               |
| Metronidazole |               | -                 | -                 | -               | 0.125             | 0.5               | 0               |
| Rifampicin    |               | -                 | -                 | -               | 0.004             | 1.5               | 23.8            |
| Vancomycin    |               | -                 | -                 | -               | 1.0               | 1.5               | 0               |
| RT 002        |               | Ampicillin        | -                 | -               | -                 | 1.0               | 1.0             |
|               | Amox-clav     | -                 | -                 | -               | 0.19              | 1.0               | 0               |
|               | Clindamycin   | -                 | -                 | -               | 2                 | 256               | 56.5            |
|               | Erythromycin  | -                 | -                 | -               | 256               | 256               | 60.8            |
|               | Levofloxacin  | -                 | -                 | -               | 32                | 32                | 100             |
|               | Meropenem     | -                 | -                 | -               | 0.5               | 1                 | 0               |
|               | Metronidazole | -                 | -                 | -               | 0.19              | 0.5               | 0               |
|               | Rifampicin    | -                 | -                 | -               | 0.002             | 32                | 17.4            |
|               | Vancomycin    | -                 | -                 | -               | 0.75              | 2                 | 0               |
|               | RT 003        | Ampicillin        | -                 | -               | -                 | 0.25              | 1.5             |
| Amox-clav     |               | -                 | -                 | -               | 0.125             | 1                 | 0               |
| Clindamycin   |               | -                 | -                 | -               | 96                | 256               | 41.7            |
| Erythromycin  |               | -                 | -                 | -               | 64                | 256               | 58.3            |
| Levofloxacin  |               | -                 | -                 | -               | 32                | 32                | 100             |
| Meropenem     |               | -                 | -                 | -               | 0.38              | 1                 | 0               |
| Metronidazole |               | -                 | -                 | -               | 0.094             | 0.5               | 0               |
| Rifampicin    |               | -                 | -                 | -               | <0.002            | 0.002             | 8.3             |
| Vancomycin    |               | -                 | -                 | -               | 0.75              | 1.5               | 0               |
| RT 126        |               | Ampicillin        | -                 | -               | -                 | 0.25              | 1.5             |
|               | Amox-clav     | -                 | -                 | -               | 0.38              | 1                 | 0               |
|               | Clindamycin   | -                 | -                 | -               | 2                 | 256               | 42.9            |
|               | Erythromycin  | -                 | -                 | -               | 48                | 256               | 50              |
|               | Levofloxacin  | -                 | -                 | -               | 32                | 32                | 100             |
|               | Meropenem     | -                 | -                 | -               | 0.5               | 1.0               | 0               |
|               | Metronidazole | -                 | -                 | -               | 0.094             | 0.5               | 0               |
|               | Rifampicin    | -                 | -                 | -               | 0.002             | 0.002             | 0               |
|               | Vancomycin    | -                 | -                 | -               | 0.5               | 2                 | 0               |

RT = PCR ribotype

doi:10.1371/journal.pone.0161411.t004

acquired and 35 community-acquired *C. difficile* isolates. Our data showed that 2.9% of HA-CD were resistant to metronidazole while all CA-CD isolates were susceptible. However, worthy of note was the higher MIC<sub>90</sub> values demonstrated by current CA-CD isolates compared to earlier study for HA-CD, 0.75 vs. 0.19 µg/ml, respectively. This is in contrast to the surveillance studies in Spain and Texas, which reported much higher resistance rates of clinical *C. difficile* isolates to metronidazole (6.3% and 13.3%), respectively [22, 23], unlike lower resistance level of 0.11% reported in the European surveillance study by Freeman *et al* [24]. In the Pelaez *et al* study, metronidazole resistance was heterogeneous and not related to the presence of *nim* genes [22]. All our CA-CD and HA-CD isolates were susceptible to vancomycin however with higher MIC<sub>90</sub> values compared to earlier study for HA-CD (3.0 vs. 0.75 µg/ml). This finding is consistent with previous reports [25, 26] which demonstrated MIC<sub>90</sub> of 0.75 and 2 µg/ml, respectively. Contrastingly, a pan-European surveillance study in 22 European countries reported a 0.9% vancomycin resistance rate [24]. However the role of vancomycin resistant *C. difficile* is not clear because of the high concentration of vancomycin in the colon of patients after oral vancomycin therapy [27].

In our study, non-susceptibility to imipenem was high in both CA-CD and HA-CD (100 vs. 89%) whereas meropenem resistance was high for only CA-CD (43 vs. 0%). Imipenem resistance in this study is similar to our previous study [21] for HA-CD isolates as well as to the study in Poland [25] which reported that 86%, 87.9%, respectively, of their strains were resistant to imipenem. These reports differ from other studies in Korea and Europe where resistance of HA-CD isolates to imipenem was relatively low 7.4% and 8%, respectively [26, 28]. While resistance to meropenem was zero in the previous study in Kuwait as well as in Australia [21, 26] for HA-CD isolates, it was relatively high with the CA-CD isolates. Imipenem and meropenem have been used liberally in Kuwait hospitals for the last two decades, which may have led to the selection pressure for resistance to imipenem and meropenem secondary to drug exposure.

Clindamycin resistance was observed in 43% and 47% of CA-CD and HA-CD isolates, respectively, a finding similar to results of our previous study (48%) [21] and a European study (49.62%) [24] but much higher than that reported previously in Poland (27.7%) [25]. It is, however, lower than reports from Australia [26] and Korea [28] where 84.3% and 81%, respectively were resistant. Interestingly, there was a remarkable difference in the resistance levels to erythromycin which was observed in 14.3% of CA-CD isolates compared to 58% of HA-CD isolates. The Korean [28] and Polish [25] studies reported high level resistance to erythromycin, of 80% and 85.5%, respectively.

Rifampicin resistance was 16% among our HA-CD isolates. This is similar to reports from Poland and Europe of 13.40% and 18%, respectively [24, 25], but unlike reports from Australia where the resistance rate to rifaximin was almost 0% [26]. The relatively high rifampicin resistance rate in our study may be explained, in part, by the concurrent high rifampicin resistance rates of 10% amongst the *Staphylococcus aureus* isolates in Kuwait [29] and of 9.2% rate amongst the *Mycobacterium tuberculosis* isolates [30]. In Poland, rifampicin resistance has emerged in an outbreak of *C. difficile* ribotype 046 in patients on long term treatment of rifampicin for tuberculosis [31].

We found a striking difference between the susceptibilities of our isolates (HA-CD and CA-CD) to the quinolones, in particular levofloxacin, and the Australian isolates. While all our isolates were resistant as in our previous study of 97% to trovafloxacin, only 3.4% of the Australian isolates were reported as resistant to moxifloxacin [26].

One of the limitations of this study is the relatively small number of CA-CDI isolates, which is probably a true reflection of the paucity of CDI in our country. The second limitation was the use of E test for testing the susceptibility of the isolates to metronidazole. Although CLSI



recommends agar dilution method to test for metronidazole MIC, comparison of MICs determined by agar dilution and E test has shown good correlation ( $\pm 2$  dilutions) of 86.6, 95.9, and 99% for metronidazole, vancomycin and teicoplanin, respectively, as reported by Barbut *et al* [32]. In addition, antimicrobial susceptibility testing of *C. difficile* by E test method has been well documented in previous reports in the literature [21, 24, 31].

## Conclusions

We did not encounter any vancomycin-resistant isolate amongst the HA-CD and CA-CD isolates in this series but few metronidazole resistant hospital isolates were isolated. Ampicillin, clindamycin, levofloxacin and imipenem resistance were evidently at unacceptable levels for both CA-CD and HA-CD isolates. We noted that rifampicin resistance is emerging among the HA-CD isolates and this calls for caution in the use of rifampicin for infections other than *Mycobacterium tuberculosis*. Therefore, we recommend periodic surveillance and regular antimicrobial susceptibility testing for all toxigenic *C. difficile* isolates as an informed guide to empiric antibiotic use.

## Acknowledgments

Kuwait University Research Grant no MI 05/10 is fully acknowledged. We thank Mrs. May Shahin and Mrs. Eunice Emanuel for their technical assistance and for performing the experiments. We also thank all the participating hospitals for sending the stool samples to our laboratory. We thank Dr Abdullah Al-Taiar for helping with the statistics.

## Author Contributions

**Conceptualization:** WYJ VOR.

**Data curation:** WYJ.

**Formal analysis:** WYJ VOR.

**Funding acquisition:** WYJ.

**Investigation:** WYJ VOR.

**Methodology:** WYJ.

**Project administration:** WYJ.

**Resources:** WYJ.

**Software:** WYJ VOR.

**Supervision:** WYJ VOR.

**Validation:** WYJ VOR.

**Visualization:** WYJ VOR.

**Writing - original draft:** WYJ.

**Writing - review & editing:** VOR.

## References

1. Loo VG, Poirier L, Miller MA, Oughton M, Libman MD, Michaud S, et al. A predominantly clonal multi-institutional outbreak of *Clostridium difficile*-associated diarrhea with high morbidity and mortality. *N Engl J Med*. 2005; 353: 2442–2449. PMID: [16322602](#)

2. Goorhuis A, Bakker D, Corver J, Debast SB, Harmanus C, Notermans DW, et al. Emergence of *Clostridium difficile* infection due to new hypervirulent strain, polymerase chain reaction ribotype 078. *Clin Infect Dis*. 2008; 47: 1162–1170. doi: [10.1086/592257](https://doi.org/10.1086/592257) PMID: [18808358](https://pubmed.ncbi.nlm.nih.gov/18808358/)
3. Riley TV, Thean S, Hool G, Golledge CL. First Australian isolation of epidemic *Clostridium difficile* PCR ribotype 027. *Med J Aust*. 2009; 190: 706–708. PMID: [19527210](https://pubmed.ncbi.nlm.nih.gov/19527210/)
4. O'Connor JR, Johnson S, Gerding DN. *Clostridium difficile* infection caused by the epidemic BI/NAP1/027 strains. *Gastroenterology*. 2009; 136: 1913–1924. doi: [10.1053/j.gastro.2009.02.073](https://doi.org/10.1053/j.gastro.2009.02.073) PMID: [19457419](https://pubmed.ncbi.nlm.nih.gov/19457419/)
5. Freeman J, Bauer MP, Baines SD, Corver J, Fawley WN, Goorhuis B, et al. The changing epidemiology of *Clostridium difficile* infections. *Clin Microbiol Rev*. 2010; 23: 529–549. doi: [10.1128/CMR.00082-09](https://doi.org/10.1128/CMR.00082-09) PMID: [20610822](https://pubmed.ncbi.nlm.nih.gov/20610822/)
6. Kuijper EJ, van Dissel JT. Spectrum of *Clostridium difficile* infections outside health care facilities. *CMAJ*. 2008; 179: 747–748. doi: [10.1503/cmaj.081211](https://doi.org/10.1503/cmaj.081211) PMID: [18838443](https://pubmed.ncbi.nlm.nih.gov/18838443/)
7. Roupheal NG, O'Donnell JA, Bhatnagar J, Lewis F, Polgreen PM, Beekmann S, et al. *Clostridium difficile*-associated diarrhea: an emerging threat to pregnant women. *Am J Obstet Gynecol*. 2008; 198: 635.e1–6.
8. Owens RC Jr, Donskey CJ, Gaynes RP, Loo VG, Muto CA. Antimicrobial-associated risk factors for *Clostridium difficile* infection. *Clin Infect Dis*. 2008; 46 (Suppl. 1): S19–31. doi: [10.1086/521859](https://doi.org/10.1086/521859) PMID: [18177218](https://pubmed.ncbi.nlm.nih.gov/18177218/)
9. Muto CA, Pokrywka M, Shutt K, Mendelsohn AB, Nouri K, Posey K, et al. A large outbreak of *Clostridium difficile*-associated disease with an unexpected proportion of deaths and colectomies at a teaching hospital following increased fluoroquinolone use. *Infect Control Hosp Epidemiol*. 2005; 26: 273–280. PMID: [15796280](https://pubmed.ncbi.nlm.nih.gov/15796280/)
10. Pelaez T, Cercenado E, Alcalá L, Marin M, Martín-López A, Martínez-Alarcón J, et al. Metronidazole resistance in *Clostridium difficile* is heterogeneous. *J Clin Microbiol*. 2008; 46: 3028–3032. doi: [10.1128/JCM.00524-08](https://doi.org/10.1128/JCM.00524-08) PMID: [18650353](https://pubmed.ncbi.nlm.nih.gov/18650353/)
11. Baines SD, O'Connor R, Freeman J, Fawley WN, Harmanus C, Mastrantonio P, et al. Emergence of reduced susceptibility to metronidazole in *Clostridium difficile*. *J Antimicrob Chemother*. 2008; 62: 1046–1052. doi: [10.1093/jac/dkn313](https://doi.org/10.1093/jac/dkn313) PMID: [18693234](https://pubmed.ncbi.nlm.nih.gov/18693234/)
12. Spigaglia P, Barbanti F, Mastrantonio P, European Study Group on *Clostridium difficile* (ESGCD). Multidrug resistance in European *Clostridium difficile* clinical isolates. *J Antimicrob Chemother*. 2011; 66: 2227–2234. doi: [10.1093/jac/dkr292](https://doi.org/10.1093/jac/dkr292) PMID: [21771851](https://pubmed.ncbi.nlm.nih.gov/21771851/)
13. Debast SB, Bauer MP, Kuijper EJ, European Society of Clinical Microbiology and Infectious Diseases. European Society of Clinical Microbiology and Infectious Diseases: update on the treatment guidance document for *Clostridium difficile* infection. *Clin Microbiol Infect*. 2014; 20 (Suppl. 2): 1–26. doi: [10.1111/1469-0691.12418](https://doi.org/10.1111/1469-0691.12418) PMID: [24118601](https://pubmed.ncbi.nlm.nih.gov/24118601/)
14. Cohen SH, Gerding DN, Johnson S, Kelly CP, Loo VG, McDonald LC, et al. Clinical practice guidelines for *Clostridium difficile* in adults: 2010 update by the society for healthcare epidemiology of America (SHEA) and the infectious diseases society of America (IDSA). *Infect Control Hosp Epidemiol*. 2010; 31: 431–455. doi: [10.1086/651706](https://doi.org/10.1086/651706) PMID: [20307191](https://pubmed.ncbi.nlm.nih.gov/20307191/)
15. Surawicz CM, Brandt LJ, Binion DG, Ananthakrishnan AN, Curry SR, Gilligan PH, et al. Guidelines for diagnosis, treatment, and prevention of *Clostridium difficile* infections. *Am J Gastroenterol*. 2013; 108: 478–498. doi: [10.1038/ajg.2013.4](https://doi.org/10.1038/ajg.2013.4) PMID: [23439232](https://pubmed.ncbi.nlm.nih.gov/23439232/)
16. Kuijper EJ, Coignard B, Tull P, ESCMID Study Group for *Clostridium difficile*; EU Member States; European Centre for Disease Prevention and Control. Emergence of *Clostridium difficile*-associated disease in North America and Europe. *Clin Microbiol Infect*. 2006; 12 (Suppl. 6): 2–18. PMID: [16965399](https://pubmed.ncbi.nlm.nih.gov/16965399/)
17. CLSI, Clinical Laboratory and Standards Institute. Performance Standards for Antimicrobial Susceptibility Testing; Twenty-Fourth Informational Supplement. M100-S24, Wayne, PA, USA, 2014.
18. Pelaez T, Alonso R, Perez C, Alcalá L, Cuevas O, Bouza E. In vitro activity of linezolid against *Clostridium difficile*. *Antimicrob Agents Chemother*. 2002; 46: 1617–1618. PMID: [11959617](https://pubmed.ncbi.nlm.nih.gov/11959617/)
19. CLSI, Clinical Laboratory and Standards Institute. Performance Standards for Antimicrobial Susceptibility; Seventeenth Informational Supplement. M100-S17. Wayne, PA, USA, 2007.
20. O'Neill GL, Ogunisola FT, Brazier JS, Duerden BI. Modification of a PCR ribotyping method for application of as a routine typing scheme for *Clostridium difficile*. *Anaerobe*. 1996; 2: 205–209.
21. Jamal WY, Mokaddas EM, Verghese TL, Rotimi VO. In vitro activity of 15 antimicrobial agents against clinical isolates of *Clostridium difficile* in Kuwait. *Int J Antimicrob Agents*. 2002; 20: 270–274. PMID: [12385683](https://pubmed.ncbi.nlm.nih.gov/12385683/)

22. Pelaez T, Alcalá L, Alonso R, Rodríguez-Creixems M, García-Lechuz JM, Bouza E. Reassessment of *Clostridium difficile* susceptibility to metronidazole and vancomycin. *Antimicrob Agents Chemother*. 2002; 46: 1647–1650. PMID: [12019070](#)
23. Norman KN, Scott HM, Harvey RB, Norby B, Hume ME. Comparison of antimicrobial susceptibility among *Clostridium difficile* isolated from an integrated human and swine population in Texas. *Food-borne Pathog Dis*. 2014; 11: 257–264. doi: [10.1089/fpd.2013.1648](#) PMID: [24320797](#)
24. Freeman J, Vernon J, Morris K, Nicholson S, Todhunter S, Longshaw L, et al. Pan-European longitudinal surveillance of antibiotic resistance among prevalent *Clostridium difficile* ribotypes. *Clin Microbiol Infect*. 2015; 21: 248.e9–248.e16.
25. Lachowicz D, Pituch H, Obuch-Woszczatynski P. Antimicrobial susceptibility patterns of *Clostridium difficile* strains belonging to different polymerase chain reaction ribotypes isolated in Poland 2012. *Anaerobe*. 2015; 31: 37–41. doi: [10.1016/j.anaerobe.2014.09.004](#) PMID: [25242196](#)
26. Knight DR, Giglio S, Huntington PG, Korman TM, Kotsanas D, Moore CV, et al. Surveillance for antimicrobial resistance in Australian isolates of *Clostridium difficile*, 2013–14. *J Antimicrob Chemother*. 2015; 70: 2992–2999. doi: [10.1093/jac/dkv220](#) PMID: [26221017](#)
27. Gonzales M, Pepin J, Frost EH, Carrier JC, Sirard S, Fortier LC, et al. Faecal pharmacokinetics of orally administered vancomycin in patient with suspected *Clostridium difficile* infection. *BMC Infect Dis*. 2010; 10: 363. doi: [10.1186/1471-2334-10-363](#) PMID: [21192802](#)
28. Lee J-H, Lee Y, Lee K, Riley TV, Kim H. The changes of PCR ribotype and antimicrobial resistance of *Clostridium difficile* in a tertiary care hospital over 10 years. *J Med Microbiol*. 2014; 63: 819–823. doi: [10.1099/jmm.0.072082-0](#) PMID: [24696516](#)
29. Udo EE, Al-Sweih N, Mokaddas E, Johnny M, Dhar R, Gomaa HH, et al. Antibacterial resistance and their genetic location in MRSA isolated in Kuwait hospitals, 1994–2004. *BMC Infect Dis*. 2006; 6: 168.
30. Areeshi MY, Bisht SC, Mandal RK, Haque S. Prevalence of drug resistance in clinical isolates of tuberculosis from GCC: a literature review from January 2002 to March 2013. *J Infect Dev Ctries*. 2014; 8: 1137–1147. doi: [10.3855/jdc.4053](#) PMID: [25212078](#)
31. Obuch-Woszczatynski P, Dubiel G, Harmanus C, Kuijper E, Duda U, Wultanska D, et al. Emergence of *Clostridium difficile* infection in tuberculosis patients due to a highly rifampicin-resistant PCR ribotype 046 clone in Poland. *Eur J Clin Microbiol Infect Dis*. 2013; 32: 1027–1030. doi: [10.1007/s10096-013-1845-5](#) PMID: [23443474](#)
32. Barbut F, Decré D, Burghoffer B, Lesage D, Delisle F, Lalande V, et al. Antimicrobial susceptibilities and serogroups of clinical strains of *Clostridium difficile* isolated in France in 1991 and 1997. *Antimicrob Agents Chemother*. 1999; 43: 2607–2611. PMID: [10543736](#)
